# Supplementary material for: Novel single excitation dual-emission carbon dots for colorimetric and ratiometric fluorescent dual mode detection of Cu2+ and Al3+ ions
Source: Royal Society of Chemistry journal article supplement (doi:10.1039/c9ra07030c), 2019-01-01
Supplement: c9ra07030c1.pdf [file c9ra07030c1.pdf]

# A novel single excitation dual-emission carbon dots for colorimetric and ratiometric fluorescent dual mode detection of Cu<sup>2+</sup> and Al<sup>3+</sup> ions

Jinping Song <sup>a</sup>, Qi Ma <sup>a,\*</sup>, Yequn Liu <sup>b,\*</sup>, Yong Guo <sup>a</sup>, Feng Feng <sup>a</sup>, Shaomin Shuang <sup>c</sup>,

<sup>a</sup> College of Chemistry and Environmental Engineering, and Institute of Applied Chemistry, Shanxi Datong University, Datong, Shanxi, 037009, China.

<sup>b</sup> Analytical Instrumentation Center, State Key Laboratory of Coal Conversion, Institute of Coal Chemistry, Chinese Academy of Sciences, Taiyuan 030001, China.

<sup>c</sup> Institute of Environmental Science, Shanxi University, Taiyuan, 030006, China

**Table S1.** The emission peak position and quantum yield of D-CDs prepared from different raw materials under different reaction medium.

| Raw materials | Reaction medium | $\lambda_{em}$ (nm)      | $\Phi$                  |
|---------------|-----------------|--------------------------|-------------------------|
| Green Tea     | water           | 403                      | 2.53% (blue band)       |
|               | formamide       | 409                      | 10.86% (blue band)      |
|               | ethanol         | ca. 470, 671, 715        | 3.57% (red band)        |
|               | acetone         | ca. 470, 671, 715        | 4.72% (red band)        |
| Red Tea       | water           | 420                      | 3.78% (blue band)       |
|               | formamide       | 408                      | 4.41% (blue band)       |
|               | ethanol         | ca. 470, 671, 715        | 4.48% (red band)        |
|               | <b>acetone</b>  | <b>ca. 470, 671, 715</b> | <b>5.47%</b> (red band) |
| Dark Tea      | water           | 418                      | 2.96% (blue band)       |
|               | formamide       | 415                      | 9.57% (blue band)       |
|               | ethanol         | ca.472, 671, 715         | 3.84% (red band)        |
|               | acetone         | ca.478, 671, 715         | 4.20% (red band)        |

**Table S2.** The optimization of synthetic conditions.

| Raw materials | Temperature (°C) | Reaction time | $\Phi$ (red band) |
|---------------|------------------|---------------|-------------------|
| Red Tea       | 140              | 2 h           | 4.88%             |
|               | 160              | 2 h           | 4.90%             |
|               | 180              | 2 h           | 5.47%             |
|               | 200              | 2 h           | 4.79%             |
|               | <b>180</b>       | <b>1 h</b>    | <b>6.06%</b>      |
|               | 180              | 2 h           | 5.47%             |
|               | 180              | 3 h           | 4.80%             |
|               | 180              | 4 h           | 5.20%             |
|               | 180              | 5 h           | 4.33%             |
|               | 180              | 6 h           | 4.11%             |
|               | 180              | 7 h           | 4.45%             |
|               | 180              | 8 h           | 4.85%             |

**Table S3.** Quantum yield of red emission band of D-CDs in different solvents.

|        | DMSO  | Ethanol | Acetone | Water | DMF   | Acetonitrile | THF   | CH <sub>2</sub> Cl <sub>2</sub> |
|--------|-------|---------|---------|-------|-------|--------------|-------|---------------------------------|
| $\eta$ | 1.48  | 1.36    | 1.36    | 1.33  | 1.333 | 1.343        | 1.405 | 1.424                           |
| $\Phi$ | 7.72% | 5.53%   | 6.06%   | 0.35% | 8.93% | 5.83%        | 6.26% | 5.86%                           |

**Table S4.** Rate constant of D-CDs in ethanol solution in the absence and presence of Al<sup>3+</sup> ions ( $\lambda_{\text{ex}} = 410$  nm,  $\lambda_{\text{em}} = 478$  nm)

|                                       | D-CDs | D-CDs+Al <sup>3+</sup> |
|---------------------------------------|-------|------------------------|
| $\Phi/\%$ (blue band)                 | 0.80  | 8.01                   |
| $\tau$ / ns                           | 3.83  | 4.80                   |
| $k_{\text{r}} / 10^6 \text{ s}^{-1}$  | 2.09  | 16.69                  |
| $k_{\text{nr}} / 10^8 \text{ s}^{-1}$ | 2.59  | 1.92                   |

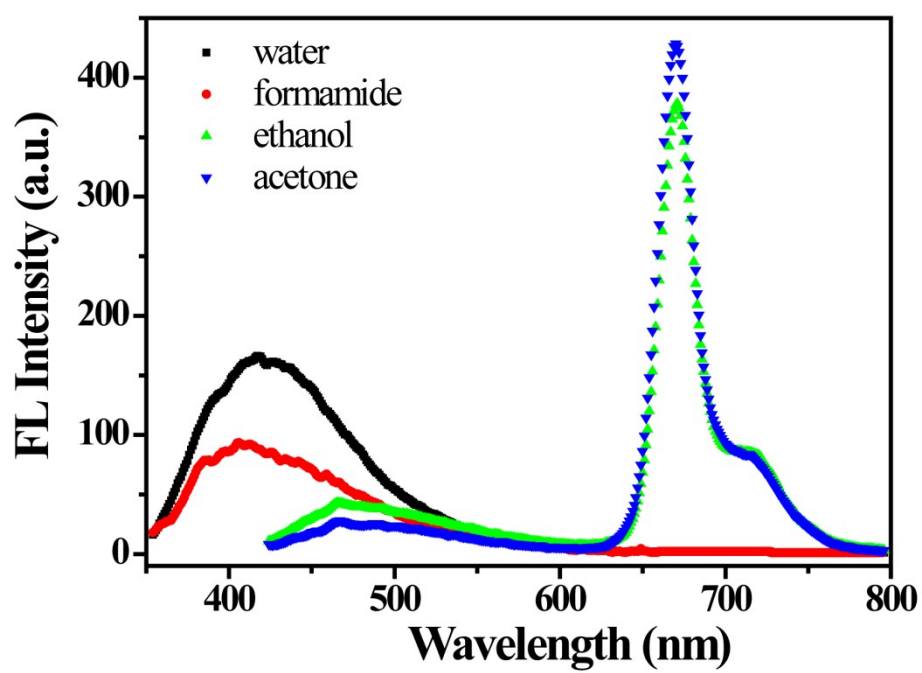

Fig. S1 FL emission spectra of carbon dots obtained in different solvents.

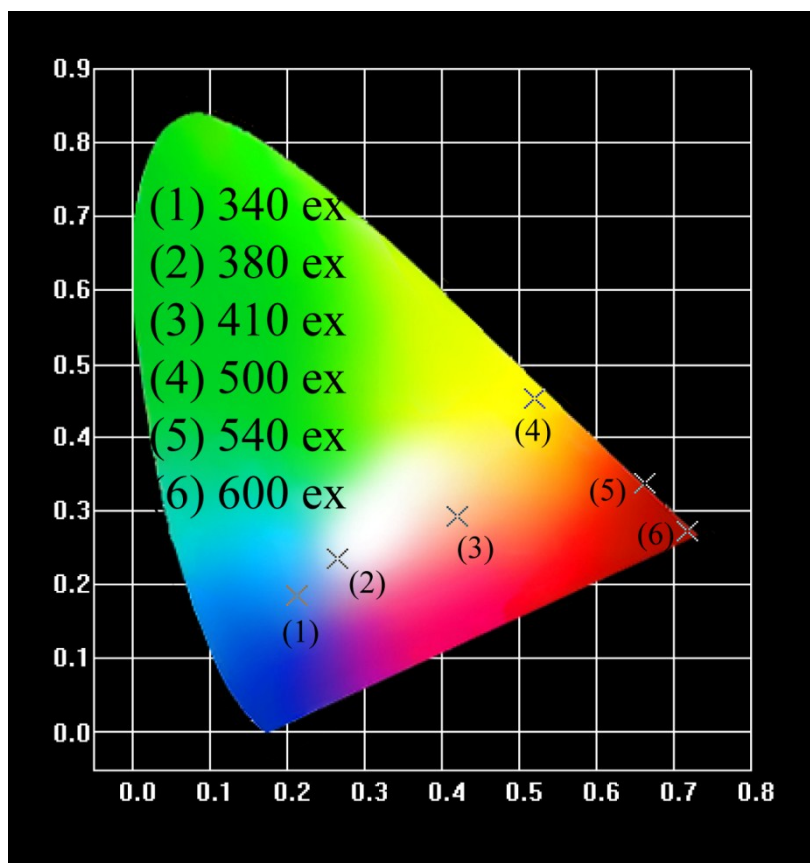

**Fig. S2** CIE chromaticity diagram of D-CDs at different excitation wavelengths.

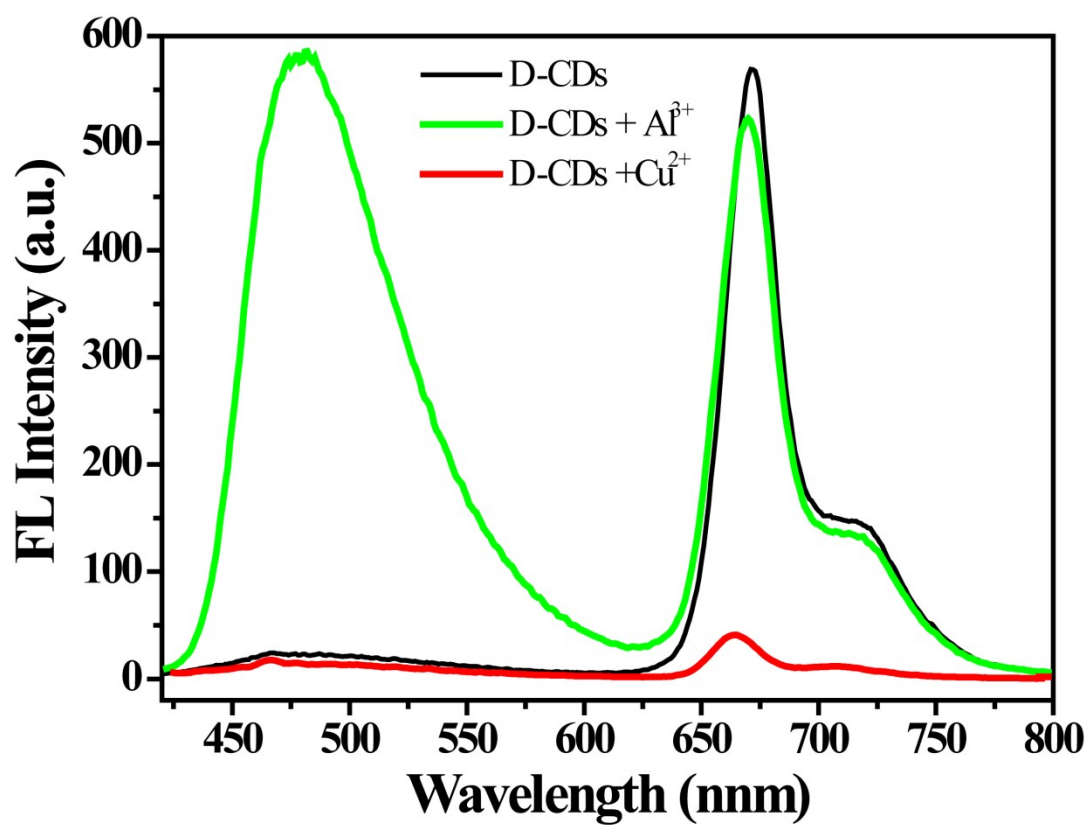

**Fig. S3** The FL spectra of D-CDs ( $\lambda_{\text{ex}} = 410$  nm) in ethanol in the absence and presence of Al<sup>3+</sup> and Cu<sup>2+</sup> ions.

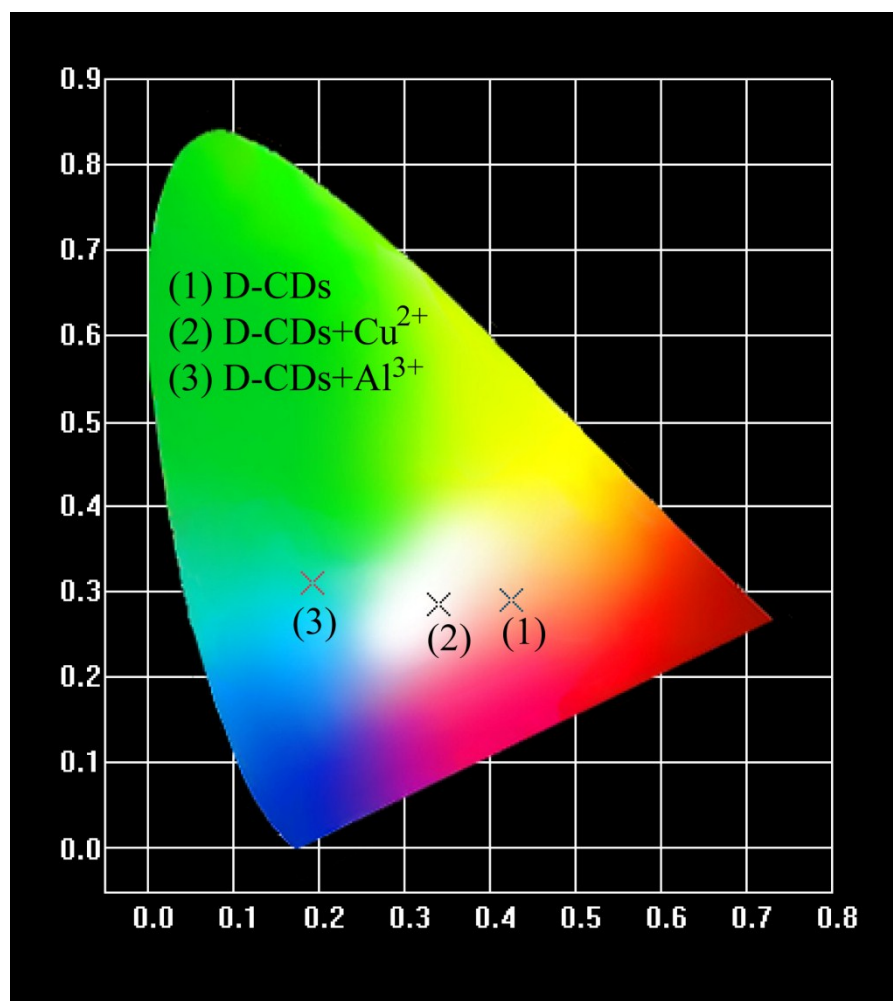

**Fig. S4** CIE chromaticity diagram of D-CDs in the absence and presence of Cu<sup>2+</sup> and Al<sup>3+</sup> ions.

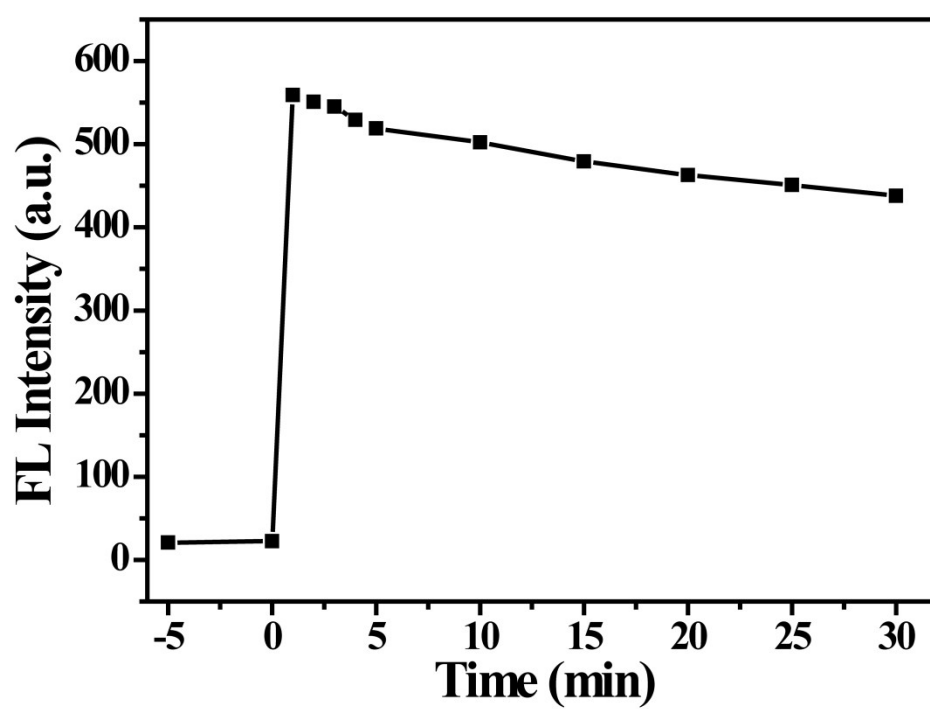

**Fig. S5** Effect of reaction time on fluorescence intensity of the blue-band of D-CDs in the presence of  $\text{Al}^{3+}$ .

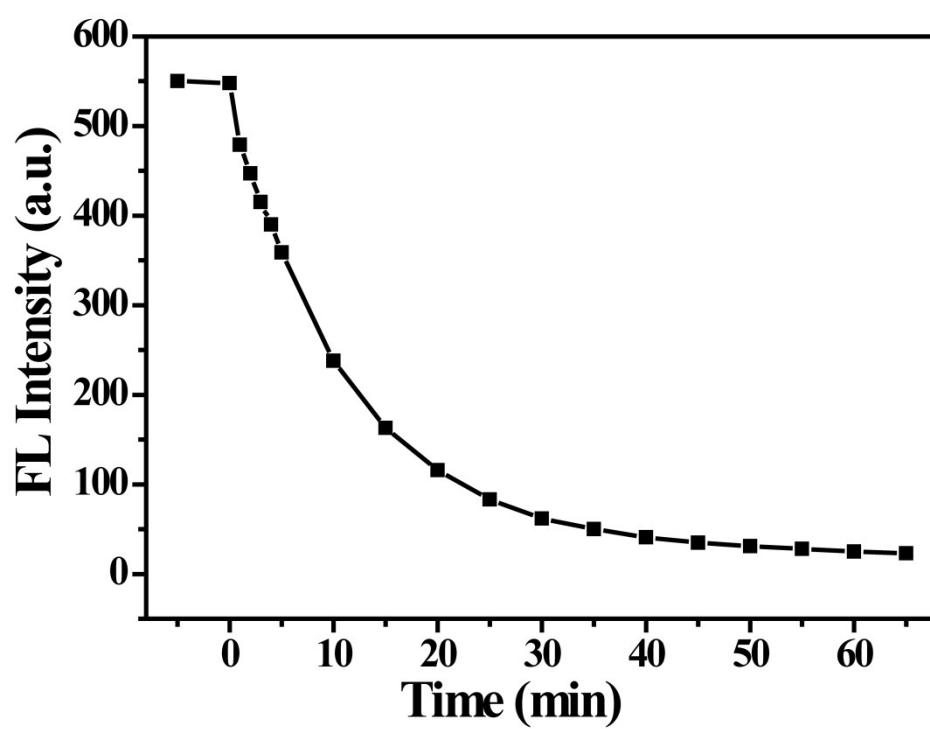

**Fig. S6** Effect of reaction time on fluorescence intensity of the red-band of D-CDs in the presence of Cu<sup>2+</sup>.

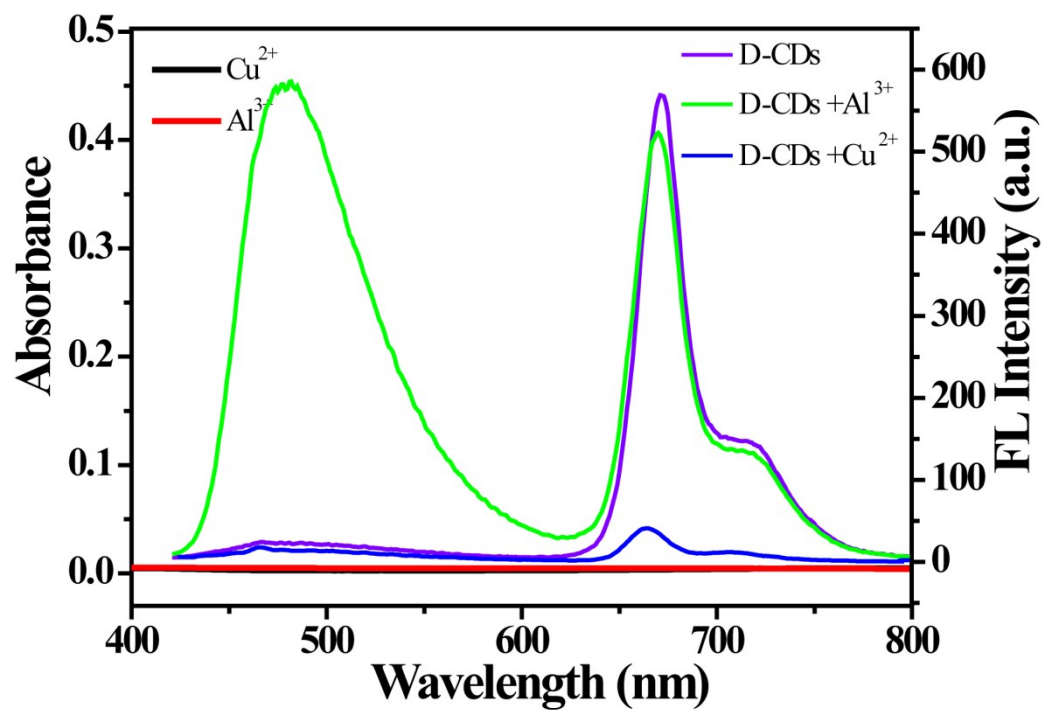

**Fig. S7** The UV absorption spectra of  $\text{Al}^{3+}$  (red curve) and  $\text{Cu}^{2+}$  (black curve), and the FL emission spectra of D-CDs in the absence and presence of  $\text{Al}^{3+}$  and  $\text{Cu}^{2+}$ .

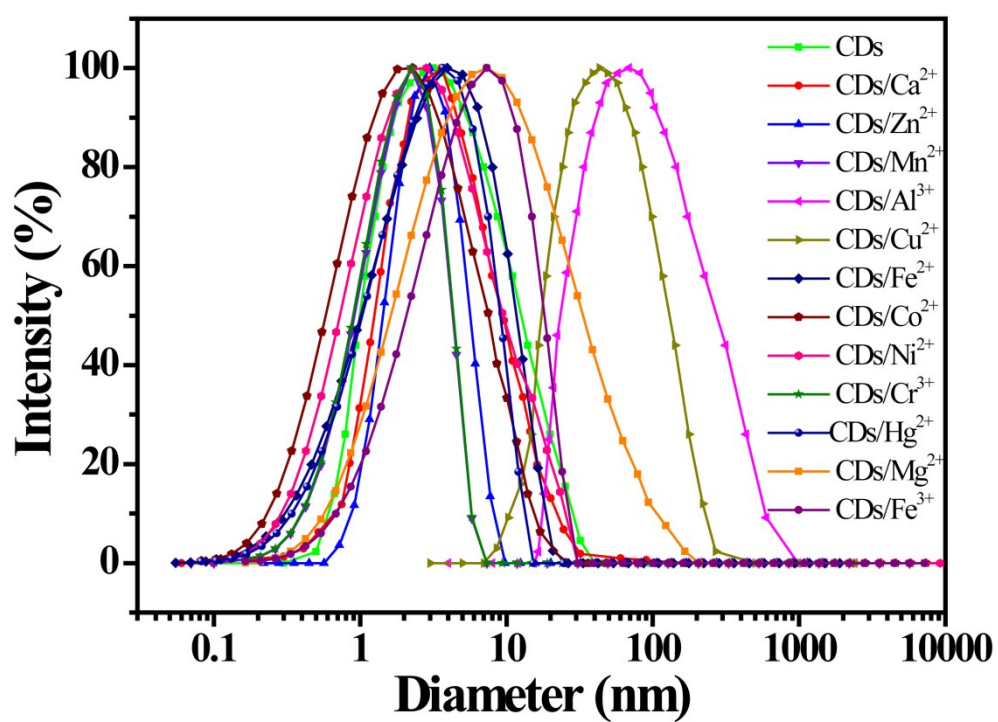

**Fig. S8** Particle size distribution profiles of D-CDs in ethanol solution in the absence and presence of different metal ions.

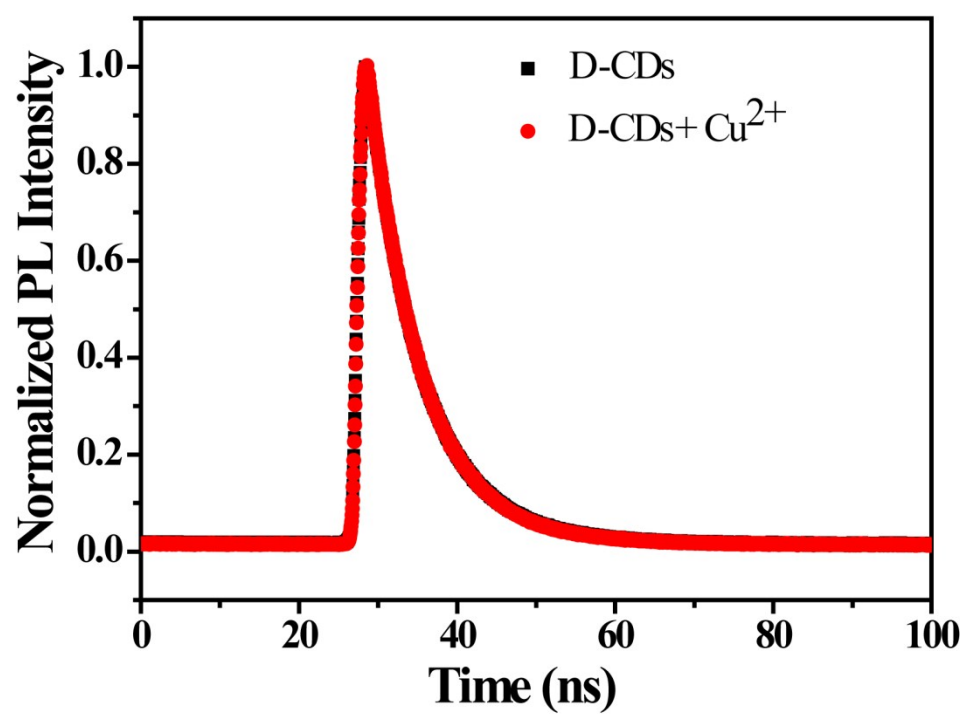

**Fig. S9** Time-resolved FL decay curves of D-CDs ethanol solution in the absence and presence of Cu<sup>2+</sup> ( $\lambda_{\text{ex}} = 410 \text{ nm}$ ,  $\lambda_{\text{em}} = 670 \text{ nm}$ ).

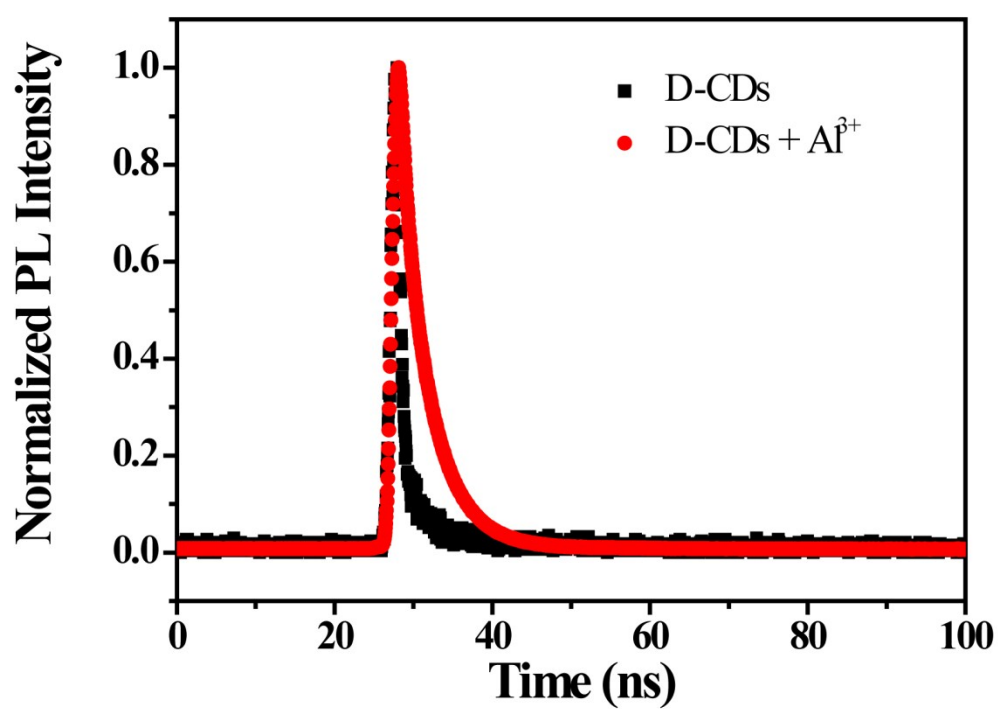

**Fig. S10** Time-resolved FL decay curves of D-CDs ethanol solution in the absence and presence of Al<sup>3+</sup> ( $\lambda_{\text{ex}} = 410 \text{ nm}$ ,  $\lambda_{\text{em}} = 470 \text{ nm}$ ).

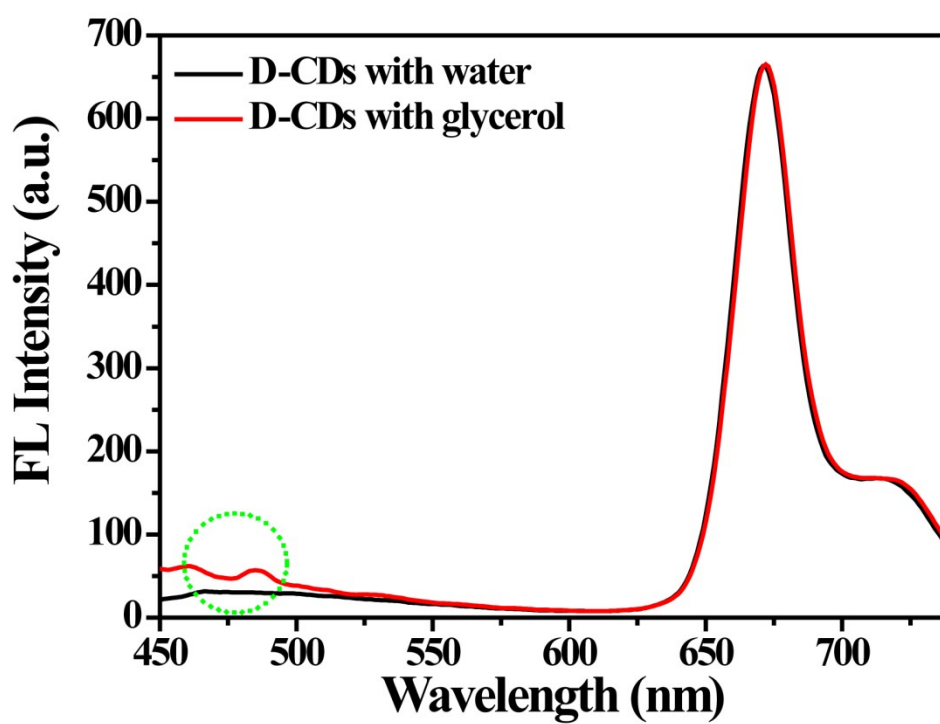

**Fig. S11** The FL emission spectra of D-CDs in aqueous solution and 25% glycerol solution.
